# Supplementary material
Source: Royal Society of Chemistry journal article supplement (doi:10.1039/d6nj00073h)
Supplement: d6nj00073h1.pdf [file d6nj00073h1.pdf]

## Supplementary Material

### Promoted catalytic degradation performance over MnO<sub>x</sub> nanoflower catalysts modified by transition metal

Jing Zhan <sup>a,b,c</sup>, FengLan Xiong <sup>a,b,c</sup>, Weifu Xiong <sup>a,b,c</sup>, Yuhan Luo <sup>b</sup>, Yingbo Yuan <sup>b</sup>, Yanli Liang <sup>a,b,c\*</sup>, Mingang Huang<sup>d</sup>, Xiaoyan Ma <sup>a,b,c\*</sup>

<sup>a</sup> Innovation Center for Chenguang High Performance Fluorine Material, Zigong, 643000, PR China.

<sup>b</sup> School of Chemistry Engineering, Sichuan University of Science and Engineering, Zigong, 643000, PR China

<sup>c</sup> Organic Fluorine Material Key Laboratory of Sichuan Province, Zigong, 643200, PR China

<sup>d</sup> The Key Laboratory of Fine Chemical Application Technology of Luzhou, Luzhou, 646000, PR China

Corresponding author:

Yanli Liang, Xiaoyan Ma

Email addresses: yanli\_liang21@163.com (Y.L. Liang), maxy@suse.edu.cn (X.Y. Ma).

The masses of the various catalysts obtained after calcination are as follows: MnOx-NP-AA weighed 2.1210 g, MnOx-NP-CA weighed 1.7648 g, and MnOx-NF weighed 4.3707 g.

Fourier-transform infrared (FT-IR) spectrometer were performed to detect the surficial functional group via Thermo Fisher.

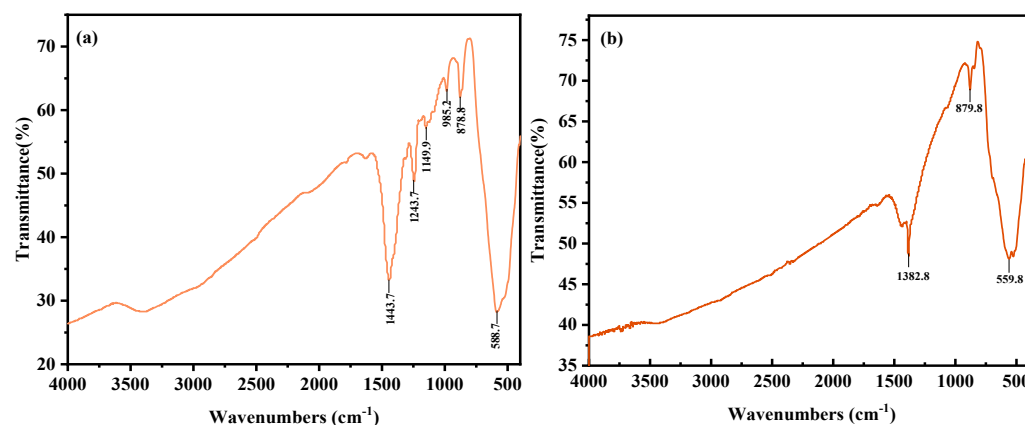

Fig. S1. Infrared spectra of perfluoropolyether (a) Before decomposition and (b) After decomposition

PFPE utilizes a Y-type polyether with the fundamental structure  $\text{CF}_3\text{O}(\text{C}_3\text{F}_6\text{O})_m(\text{CF}_2\text{O})_n\text{CF}_3$ . The supplier is Fujian Yonghong Advanced Materials Co., Ltd. Additional relevant properties of PFPE are detailed in Table S1.

Table S1 Related Properties of PFPE-

|                                |                        |
|--------------------------------|------------------------|
| Average molecular weight       | 1500                   |
| ISO Viscosity Grade            | 100                    |
| Density (20°C)                 | 1.91 g/cm <sup>3</sup> |
| Kinematic viscosity (20°C)     | 300 mm <sup>2</sup> /s |
| Kinematic viscosity (40°C)     | 100 mm <sup>2</sup> /s |
| Viscosity Index                | 110                    |
| tipping point                  | -34 °C                 |
| Evaporation loss (120°C, 22hr) | 0.1 %                  |
| Acid value                     | 0.01 MgKOH/g           |

In the experiment, a Hitachi ICS-1000 ion chromatograph was used to determine the concentration of fluoride ions in the samples.

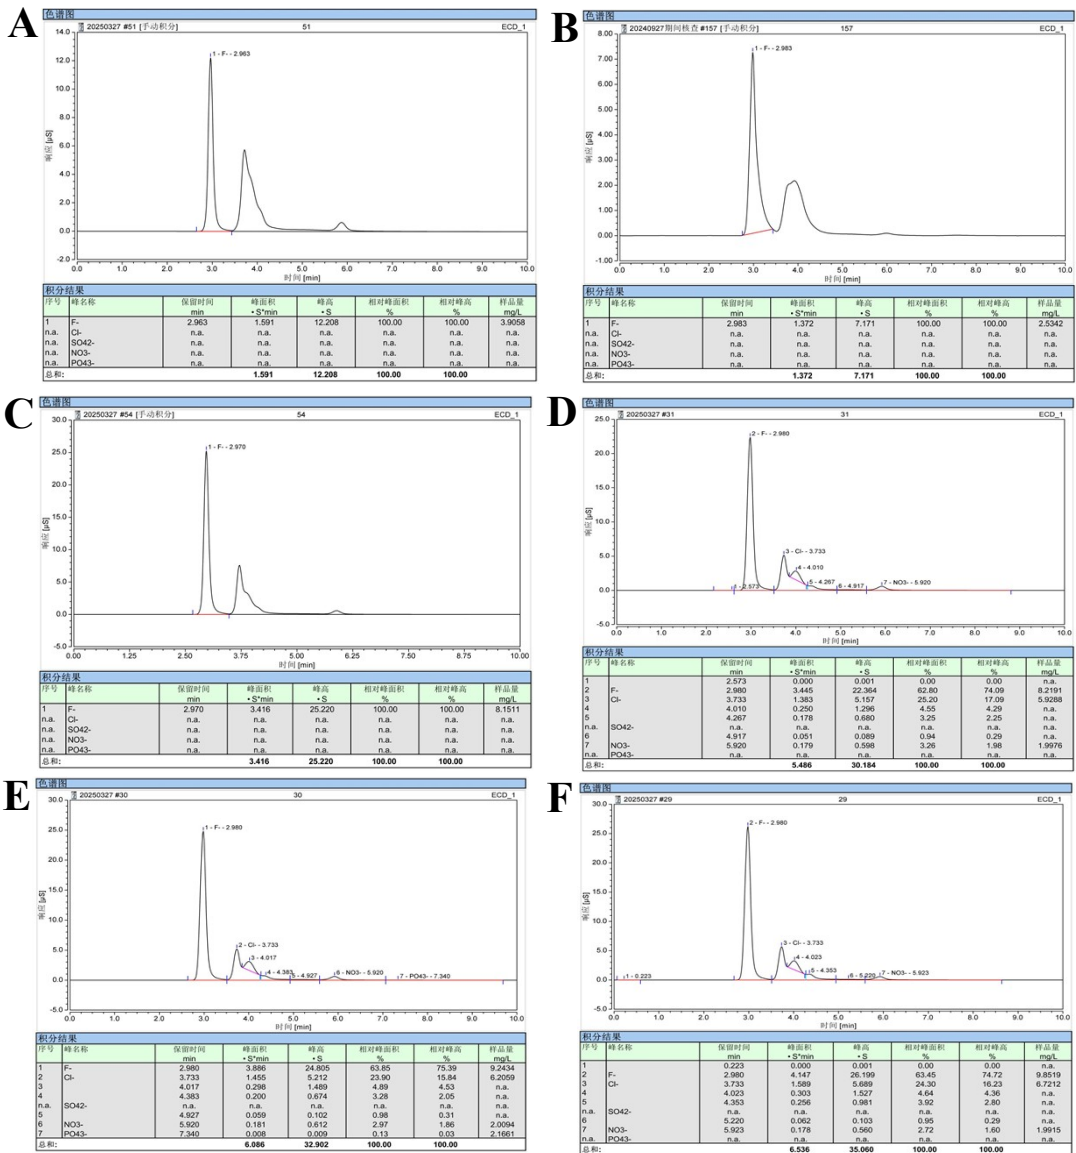

Fig.S2 Ion chromatogram (A) MnOx-NP-AA (B) MnOx-NP-CA (C) MnOx-NF (D) Co/MnOx-NF (E)

Ni/MnOx-NF (F) Fe/MnOx-NF
